# Supplementary material
Source: MDPI journal article supplement (https://www.mdpi.com/1996-1073/16/15/5630)
Supplement: s1 [file s1]

---

*Supplementary Material*

# System Hydrodynamics of a 1 MW<sub>th</sub> Dual Circulating Fluidized Bed Chemical Looping Gasifier

Paul Dieringer \*, Falko Marx, Jochen Ströhle \* and Bernd Epple

Institute for Energy Systems and Technology, Otto-Berndt-Str. 2, 64287 Darmstadt, Germany;  
falko.marx@est.tu-darmstadt.de (F.M.); bernd.epple@est.tu-darmstadt.de (B.E.)

\* Correspondence: paul.dieringer@est.tu-darmstadt.de (P.D.); jochen.stroehle@est.tu-darmstadt.de (J.S.)

**Explanation:** This supplementary Material Contains the most important boundary conditions for the operating points under consideration. Chapter S1 contains the boundary conditions for the 1 MW<sub>th</sub> pilot plant, Chapter S2 for the cold flow model.

## Supplementary Material S1 – Boundary Conditions of Operating periods from 1 MW<sup>th</sup> Pilot Plant under Consideration

The boundary conditions for each steady-state operating period under consideration are listed in **Table S1** (K1), **Table S2** (K2), and **Table S3** (K3).

**Table S1.** Operating conditions for steady-state operating periods under investigation in K1 with corresponding solid samples. K1-BPX (steady-state operating period).

| Variable                      | Description                                     | BP1                    | BP2                    | BP3                    | BP4                    | BP5                    | BP6                     | BP7                     | Unit               |
|-------------------------------|-------------------------------------------------|------------------------|------------------------|------------------------|------------------------|------------------------|-------------------------|-------------------------|--------------------|
| $\dot{m}_{\text{Feedstock}}$  | Mass flow of biomass pellets to FR              | 156.1                  | 167.5                  | 163.4                  | 175.4                  | 190.3                  | 191.5                   | 223.2                   | kg/h               |
| $\dot{m}_{\text{Make-Up}}$    | Mass flow of OC to LS1                          | 34.7                   | 88.4                   | 68.2                   | 56.6                   | 0                      | 41.9                    | 0                       | kg/h               |
| $T_{\text{AR}}$               | AR max. temperature                             | 898.6                  | 885.2                  | 879.3                  | 884.8                  | 843.6                  | 877.2                   | 958.6                   | °C                 |
| $T_{\text{FR}}$               | FR max. temperature                             | 812.2                  | 820.9                  | 821.7                  | 821.9                  | 756.7                  | 772.9                   | 858.9                   | °C                 |
| $\Delta p_{\text{AR}}$        | AR pressure drop (inventory)                    | 21.5                   | 32.9                   | 44.4                   | 39.5                   | 29                     | 32.8                    | 41.7                    | mbar               |
| $p_{\text{AR,Cyclone}}$       | Pressure downstream of AR cyclone               | -3.1                   | -3.1                   | -3.1                   | -3.1                   | -3.1                   | -3.1                    | -1                      | mbar               |
| $\Delta p_{\text{FR}}$        | FR pressure drop (inventory)                    | 37.5                   | 45.9                   | 49.5                   | 50.3                   | 65.1                   | 65.8                    | 70.6                    | mbar               |
| $p_{\text{FR,Cyclone}}$       | Pressure downstream of FR cyclone               | 5.5                    | 5.4                    | 5.5                    | 5.6                    | 5.1                    | 5.2                     | 7.4                     | mbar               |
| $\dot{m}_{\text{FM,FR}}$      | Mass flow of FR fluidization (H <sub>2</sub> O) | 304.8                  | 306                    | 301.6                  | 297.2                  | 249.8                  | 253.7                   | 237.7                   | kg/h               |
| $\dot{m}_{\text{FM,AR}}$      | Mass flow of AR fluidization*                   | 953.7                  | 952.3                  | 952.1                  | 953.9                  | 932.5                  | 921.7                   | 1004.8                  | kg/h               |
| $\dot{m}_{\text{CHS,AR}}$     | Mass flow of propane entering AR                | 16.6                   | 18.3                   | 19.4                   | 19.4                   | 19.4                   | 19.4                    | 8.6                     | kg/h               |
| $\dot{m}_{\text{FM,LS1}}$     | Vol. flow of LS1 fluidization                   | 19.2 (N <sub>2</sub> ) | 19.3 (N <sub>2</sub> ) | 19.2 (N <sub>2</sub> ) | 19.4 (N <sub>2</sub> ) | 20.5 (N <sub>2</sub> ) | 22 (N <sub>2</sub> )    | 16 (N <sub>2</sub> )    | Nm <sup>3</sup> /h |
| $\dot{m}_{\text{FM,LS5}}$     | Vol. flow of LS5 fluidization                   | 26.7 (N <sub>2</sub> ) | 29.2 (N <sub>2</sub> ) | 29.9 (N <sub>2</sub> ) | 30.8 (N <sub>2</sub> ) | 30.4 (N <sub>2</sub> ) | 31 (N <sub>2</sub> )    | 20.6 (CO <sub>2</sub> ) | Nm <sup>3</sup> /h |
| $\dot{m}_{\text{FM,J-Valve}}$ | Vol. flow of J-Valve fluidization               | 13.4 (N <sub>2</sub> ) | 15.7 (N <sub>2</sub> ) | 16.8 (N <sub>2</sub> ) | 16.9 (N <sub>2</sub> ) | 18.3 (N <sub>2</sub> ) | 18.1 (CO <sub>2</sub> ) | 18.4 (N <sub>2</sub> )  | Nm <sup>3</sup> /h |
| <b>Solid</b>                  | Name of Solid Sample from LS1 &                 | //                     | //                     | //                     | //                     | //                     | //                      | //                      | -                  |
| <b>Samples</b>                | LS5                                             | //                     | //                     | //                     | //                     | //                     | //                      | //                      | -                  |
| $d_{p,m}$                     | Average particle diameter of OC                 | //                     | //                     | //                     | //                     | //                     | //                      | //                      | μm                 |
| $Q_p$                         | Particle density of OC                          | //                     | //                     | //                     | //                     | //                     | //                      | //                      | kg/m <sup>3</sup>  |
| $\Delta X_s$                  | Change in Xs for OC samples                     | //                     | //                     | //                     | //                     | //                     | //                      | //                      | -                  |

\* AR fluidization medium: pure air or mixture of air & recycled flue gas

// No solid samples available

Cont'd: **Table S1.** Operating conditions for steady-state operating periods under investigation in K1 with corresponding solid samples. K1-BPX (steady-state operating period).

| Variable                          | Description                                     | BP8                     | BP9                     | BP10                    | BP11                    | BP12                    | BP13                    | BP14                    | BP15                    | Unit               |
|-----------------------------------|-------------------------------------------------|-------------------------|-------------------------|-------------------------|-------------------------|-------------------------|-------------------------|-------------------------|-------------------------|--------------------|
| $\dot{m}_{\text{Feedstock}}$      | Mass flow of biomass pellets to FR              | 222.8                   | 223.6                   | 226.4                   | 220.8                   | 231.8                   | 226.4                   | 235                     | 229.1                   | kg/h               |
| $\dot{m}_{\text{Make-Up}}$        | Mass flow of OC to LS1                          | 0                       | 33.2                    | 35.3                    | 24.9                    | 46.1                    | 53.8                    | 0                       | 50.9                    | kg/h               |
| $T_{\text{AR}}$                   | AR max. temperature                             | 957.9                   | 963.1                   | 974.5                   | 992.6                   | 943.3                   | 948                     | 919.8                   | 911.6                   | °C                 |
| $T_{\text{FR}}$                   | FR max. temperature                             | 858.7                   | 869                     | 892.3                   | 908.7                   | 864.6                   | 881.4                   | 839.5                   | 833.6                   | °C                 |
| $\Delta p_{\text{AR}}$            | AR pressure drop (inventory)                    | 37.8                    | 45                      | 52                      | 48.7                    | 47.3                    | 39.8                    | 55.4                    | 53.7                    | mbar               |
| $p_{\text{AR,Cyclone}}$           | Pressure downstream of AR cyclone               | -1                      | -1                      | -1                      | -1                      | -1.1                    | -1.1                    | -0.9                    | -0.9                    | mbar               |
| $\Delta p_{\text{FR}}$            | FR pressure drop (inventory)                    | 69.6                    | 61.4                    | 68                      | 66.4                    | 70.6                    | 69.3                    | 75.9                    | 73.4                    | mbar               |
| $p_{\text{FR,Cyclone}}$           | Pressure downstream of FR cyclone               | 7.8                     | 7.2                     | 7.6                     | 5.8                     | 6.8                     | 7.2                     | 5.1                     | 5.2                     | mbar               |
| $\dot{m}_{\text{FM,FR}}$          | Mass flow of FR fluidization (H <sub>2</sub> O) | 239.1                   | 232.1                   | 227                     | 229.9                   | 230.9                   | 235.7                   | 216.8                   | 217.9                   | kg/h               |
| $\dot{m}_{\text{FM,AR}}$          | Mass flow of AR fluidization*                   | 1005.7                  | 965.6                   | 965.6                   | 966.2                   | 970.2                   | 1000.6                  | 969.4                   | 971                     | kg/h               |
| $\dot{m}_{\text{CH}_4,\text{AR}}$ | Mass flow of propane entering AR                | 8.6                     | 10.1                    | 10.1                    | 10.1                    | 10.1                    | 10.1                    | 6.8                     | 3.6                     | kg/h               |
| $\dot{m}_{\text{FM,LS1}}$         | Vol. flow of LS1 fluidization                   | 15.9 (N <sub>2</sub> )  | 15.7 (N <sub>2</sub> )  | 15.1 (N <sub>2</sub> )  | 14.9 (N <sub>2</sub> )  | 15.6 (N <sub>2</sub> )  | 15.2 (N <sub>2</sub> )  | 15.7 (N <sub>2</sub> )  | 15.6 (N <sub>2</sub> )  | Nm <sup>3</sup> /h |
| $\dot{m}_{\text{FM,LS5}}$         | Vol. flow of LS5 fluidization                   | 19.6 (CO <sub>2</sub> ) | 18.8 (CO <sub>2</sub> ) | 19.5 (CO <sub>2</sub> ) | 19.1 (CO <sub>2</sub> ) | 19.3 (CO <sub>2</sub> ) | 16.5 (CO <sub>2</sub> ) | 14.9 (CO <sub>2</sub> ) | 15.3 (CO <sub>2</sub> ) | Nm <sup>3</sup> /h |
| $\dot{m}_{\text{FM,J-Valve}}$     | Vol. flow of J-Valve fluidization               | 20.9 (CO <sub>2</sub> ) | 21.8 (CO <sub>2</sub> ) | 22 (CO <sub>2</sub> )   | 22 (CO <sub>2</sub> )   | 22.9 (CO <sub>2</sub> ) | 23.7 (CO <sub>2</sub> ) | 19.5 (CO <sub>2</sub> ) | 18.9 (CO <sub>2</sub> ) | Nm <sup>3</sup> /h |
| <b>Solid Samples</b>              | Name of Solid Sample from LS1 & LS5             | //                      | //                      | 1-S-42                  | //                      | //                      | //                      | //                      | 1-S-61                  | -                  |
|                                   |                                                 | //                      | //                      | 1-S-43                  | //                      | //                      | //                      | //                      | 1-S-62                  | -                  |
| $d_{p,m}$                         | Average particle diameter of OC                 | //                      | //                      | 130.3                   | //                      | //                      | //                      | //                      | 161.0                   | μm                 |
| $\rho_p$                          | Particle density of OC                          | //                      | //                      | 3673.8                  | //                      | //                      | //                      | //                      | 3499.6                  | kg/m <sup>3</sup>  |
| $\Delta X_s$                      | Change in Xs for OC samples                     | //                      | //                      | 19.9                    | //                      | //                      | //                      | //                      | 16                      | -                  |

\* AR fluidization medium: pure air or mixture of air & recycled flue gas

// No solid samples available

Cont'd: **Table S1.** Operating conditions for steady-state operating periods under investigation in K1 with corresponding solid samples. K1-BPX (steady-state operating period).

| Variable                          | Description                                     | BP16                    | BP17                    | BP18                    | BP19                    | BP20                    | BP21                    | BP22                    | BP23                    | Unit               |
|-----------------------------------|-------------------------------------------------|-------------------------|-------------------------|-------------------------|-------------------------|-------------------------|-------------------------|-------------------------|-------------------------|--------------------|
| $\dot{m}_{\text{Feedstock}}$      | Mass flow of biomass pellets to FR              | 221.3                   | 223.7                   | 221.5                   | 228.9                   | 228.9                   | 230.2                   | 226.6                   | 232.5                   | kg/h               |
| $\dot{m}_{\text{Make-Up}}$        | Mass flow of OC to LS1                          | 0                       | 1.7                     | 0                       | 0                       | 23.2                    | 91.8                    | 0                       | 13                      | kg/h               |
| $T_{\text{AR}}$                   | AR max. temperature                             | 906.2                   | 904                     | 903.3                   | 902.2                   | 893.8                   | 884.4                   | 883.7                   | 882.1                   | °C                 |
| $T_{\text{FR}}$                   | FR max. temperature                             | 821.7                   | 821.3                   | 816                     | 814.2                   | 808.8                   | 806.6                   | 800.5                   | 792.9                   | °C                 |
| $\Delta p_{\text{AR}}$            | AR pressure drop (inventory)                    | 44                      | 42.3                    | 47.2                    | 45.2                    | 47.6                    | 56.5                    | 64.4                    | 63.8                    | mbar               |
| $p_{\text{AR,Cyclone}}$           | Pressure downstream of AR cyclone               | -1.1                    | -1.1                    | -1.1                    | -1.1                    | -1.1                    | -1.1                    | -1.2                    | -1.2                    | mbar               |
| $\Delta p_{\text{FR}}$            | FR pressure drop (inventory)                    | 90                      | 91                      | 77.8                    | 74.7                    | 74.2                    | 73.5                    | 65.2                    | 63.5                    | mbar               |
| $p_{\text{FR,Cyclone}}$           | Pressure downstream of FR cyclone               | 7.4                     | 6.9                     | 7                       | 8.1                     | 6.4                     | 7.3                     | 7.2                     | 7.1                     | mbar               |
| $\dot{m}_{\text{FM,FR}}$          | Mass flow of FR fluidization (H <sub>2</sub> O) | 186.5                   | 183.7                   | 164.7                   | 181.8                   | 183.8                   | 193.8                   | 195.8                   | 197.3                   | kg/h               |
| $\dot{m}_{\text{FM,AR}}$          | Mass flow of AR fluidization*                   | 972.8                   | 968.2                   | 928.2                   | 929.3                   | 928.2                   | 969.3                   | 933.1                   | 927.2                   | kg/h               |
| $\dot{m}_{\text{CH}_4,\text{AR}}$ | Mass flow of propane entering AR                | 5.4                     | 5.4                     | 5.4                     | 5.4                     | 5.4                     | 7.2                     | 5.4                     | 5.4                     | kg/h               |
| $\dot{m}_{\text{FM,LS1}}$         | Vol. flow of LS1 fluidization                   | 15 (N <sub>2</sub> )    | 15 (N <sub>2</sub> )    | 15.2 (N <sub>2</sub> )  | 15.3 (N <sub>2</sub> )  | 15.2 (N <sub>2</sub> )  | 16 (N <sub>2</sub> )    | 16 (N <sub>2</sub> )    | 16.1 (N <sub>2</sub> )  | Nm <sup>3</sup> /h |
| $\dot{m}_{\text{FM,LS5}}$         | Vol. flow of LS5 fluidization                   | 14.9 (CO <sub>2</sub> ) | 14.8 (CO <sub>2</sub> ) | 15.7 (CO <sub>2</sub> ) | 15.5 (CO <sub>2</sub> ) | 15.8 (CO <sub>2</sub> ) | 20.3 (N <sub>2</sub> )  | 20.6 (N <sub>2</sub> )  | 20.5 (N <sub>2</sub> )  | Nm <sup>3</sup> /h |
| $\dot{m}_{\text{FM,J-Valve}}$     | Vol. flow of J-Valve fluidization               | 11.8 (CO <sub>2</sub> ) | 11.6 (CO <sub>2</sub> ) | 11.6 (CO <sub>2</sub> ) | 11.6 (CO <sub>2</sub> ) | 12.4 (CO <sub>2</sub> ) | 14.7 (CO <sub>2</sub> ) | 13.3 (CO <sub>2</sub> ) | 12.5 (CO <sub>2</sub> ) | Nm <sup>3</sup> /h |
| <b>Solid Samples</b>              | Name of Solid Sample from LS1 & LS5             | 1-S-66                  | //                      | //                      | //                      | //                      | //                      | //                      | 1-S-70                  | -                  |
|                                   |                                                 | 1-S-65                  | //                      | //                      | //                      | //                      | //                      | //                      | 1-S-69                  | -                  |
| $d_{p,m}$                         | Average particle diameter of OC                 | 147.0                   | //                      | //                      | //                      | //                      | //                      | //                      | 149.3                   | μm                 |
| $\rho_p$                          | Particle density of OC                          | 4021.1                  | //                      | //                      | //                      | //                      | //                      | //                      | 3539.1                  | kg/m <sup>3</sup>  |
| $\Delta X_s$                      | Change in Xs for OC samples                     | 19.3                    | //                      | //                      | //                      | //                      | //                      | //                      | 14.9                    | -                  |

\* AR fluidization medium: pure air or mixture of air & recycled flue gas

// No solid samples available

Cont'd: **Table S1.** Operating conditions for steady-state operating periods under investigation in K1 with corresponding solid samples. K1-BPX (steady-state operating period).

| Variable                                   | Description                                     | BP24                    | BP25                    | BP26                    | BP27                    | BP28                    | BP29                    | BP30                    | Unit               |
|--------------------------------------------|-------------------------------------------------|-------------------------|-------------------------|-------------------------|-------------------------|-------------------------|-------------------------|-------------------------|--------------------|
| $\dot{m}_{\text{Feedstock}}$               | Mass flow of biomass pellets to FR              | 229.8                   | 228.9                   | 213.7                   | 209.5                   | 209.6                   | 221.9                   | 238.8                   | kg/h               |
| $\dot{m}_{\text{Make-Up}}$                 | Mass flow of OC to LS1                          | 0                       | 10.6                    | 20.9                    | 0                       | 0                       | 0                       | 5.5                     | kg/h               |
| $T_{\text{AR}}$                            | AR max. temperature                             | 882.5                   | 868.6                   | 844                     | 840.7                   | 834                     | 833                     | 797.3                   | °C                 |
| $T_{\text{FR}}$                            | FR max. temperature                             | 794.4                   | 788.9                   | 757.7                   | 746                     | 730.3                   | 725.4                   | 722.8                   | °C                 |
| $\Delta p_{\text{AR}}$                     | AR pressure drop (inventory)                    | 64.5                    | 64                      | 63.4                    | 56                      | 50.8                    | 49                      | 74.3                    | mbar               |
| $p_{\text{AR,Cyclone}}$                    | Pressure downstream of AR cyclone               | -1.1                    | -1                      | -1                      | -1                      | -1                      | -1                      | -0.8                    | mbar               |
| $\Delta p_{\text{FR}}$                     | FR pressure drop (inventory)                    | 65.5                    | 76.8                    | 106.7                   | 124.7                   | 134.3                   | 135.6                   | 65                      | mbar               |
| $p_{\text{FR,Cyclone}}$                    | Pressure downstream of FR cyclone               | 7.6                     | 7.2                     | 7.4                     | 7.1                     | 7                       | 7.1                     | 7                       | mbar               |
| $\dot{m}_{\text{FM,FR}}$                   | Mass flow of FR fluidization (H <sub>2</sub> O) | 196.4                   | 200.6                   | 200.9                   | 203                     | 203.2                   | 204.3                   | 251.1                   | kg/h               |
| $\dot{m}_{\text{FM,AR}}$                   | Mass flow of AR fluidization*                   | 927.2                   | 944.7                   | 952.1                   | 953.5                   | 956.5                   | 957.3                   | 960.4                   | kg/h               |
| $\dot{m}_{\text{CH}_3\text{B}_2\text{AR}}$ | Mass flow of propane entering AR                | 5.4                     | 0.9                     | 0.9                     | 0.9                     | 0.9                     | 0.9                     | 0.9                     | kg/h               |
| $\dot{m}_{\text{FM,LS1}}$                  | Vol. flow of LS1 fluidization                   | 16.1 (N <sub>2</sub> )  | 16.5 (N <sub>2</sub> )  | 16.7 (N <sub>2</sub> )  | 16.7 (N <sub>2</sub> )  | 16.8 (N <sub>2</sub> )  | 16.9 (N <sub>2</sub> )  | 17.7 (N <sub>2</sub> )  | Nm <sup>3</sup> /h |
| $\dot{m}_{\text{FM,LS5}}$                  | Vol. flow of LS5 fluidization                   | 20.1 (N <sub>2</sub> )  | 18.9 (N <sub>2</sub> )  | 16.1 (CO <sub>2</sub> ) | 16.3 (CO <sub>2</sub> ) | 16.1 (CO <sub>2</sub> ) | 16.4 (CO <sub>2</sub> ) | 16.8 (CO <sub>2</sub> ) | Nm <sup>3</sup> /h |
| $\dot{m}_{\text{FM,J-Valve}}$              | Vol. flow of J-Valve fluidization               | 12.5 (CO <sub>2</sub> ) | 18.4 (CO <sub>2</sub> ) | 19.4 (CO <sub>2</sub> ) | 19.8 (CO <sub>2</sub> ) | 20.1 (CO <sub>2</sub> ) | 20.9 (CO <sub>2</sub> ) | 21.8 (CO <sub>2</sub> ) | Nm <sup>3</sup> /h |
| <b>Solid Samples</b>                       | Name of Solid Sample from LS1 & LS5             | 1-S-73                  | //                      | 1-S-75                  | 1-S-78                  | //                      | 1-S-85                  | 1-S-87                  | -                  |
|                                            |                                                 | 1-S-74                  | //                      | 1-S-76                  | 1-S-79                  | //                      | 1-S-84                  | 1-S-86                  | -                  |
| $d_{p,m}$                                  | Average particle diameter of OC                 | 134.4                   | //                      | 129.5                   | 154.8                   | //                      | 141.2                   | 128.7                   | μm                 |
| $\rho_p$                                   | Particle density of OC                          | 3542.9                  | //                      | 3430.5                  | 3716.3                  | //                      | 3941.8                  | 3438.0                  | kg/m <sup>3</sup>  |
| $\Delta X_s$                               | Change in Xs for OC samples                     | 17.3                    | //                      | 14.8                    | 13.7                    | //                      | 13.1                    | 10.3                    | -                  |

\* AR fluidization medium: pure air or mixture of air & recycled flue gas

// No solid samples available

**Table S2.** Operating conditions for steady-state operating periods under investigation in K2 with corresponding solid samples. K2-BPX (steady-state operating period).

| Variable                                   | Description                                     | BP1                     | BP2                     | BP3                     | BP4                    | BP5                     | BP6                     | BP7                     | Unit               |
|--------------------------------------------|-------------------------------------------------|-------------------------|-------------------------|-------------------------|------------------------|-------------------------|-------------------------|-------------------------|--------------------|
| $\dot{m}_{\text{Feedstock}}$               | Mass flow of biomass pellets to FR              | 207.4                   | 334.3                   | 266.4                   | 266.1                  | 257.7                   | 243.7                   | 240.5                   | kg/h               |
| $\dot{m}_{\text{Make-Up}}$                 | Mass flow of OC to LS1                          | 46.7                    | 0.0                     | 0.0                     | 0.0                    | 0.0                     | 0.0                     | 0.0                     | kg/h               |
| $T_{\text{AR}}$                            | AR max. temperature                             | 945.3                   | 980.5                   | 970.8                   | 944.8                  | 940.7                   | 934.3                   | 930.9                   | °C                 |
| $T_{\text{FR}}$                            | FR max. temperature                             | 800.4                   | 861.2                   | 855.8                   | 819.0                  | 813.9                   | 800.8                   | 788.5                   | °C                 |
| $\Delta p_{\text{AR}}$                     | AR pressure drop (inventory)                    | 67.8                    | 63.4                    | 58.0                    | 40.6                   | 38.2                    | 41.7                    | 47.4                    | mbar               |
| $p_{\text{AR,Cyclone}}$                    | Pressure downstream of AR cyclone               | -2.1                    | -2.1                    | -2.0                    | -1.9                   | -1.9                    | -2.0                    | -2.1                    | mbar               |
| $\Delta p_{\text{FR}}$                     | FR pressure drop (inventory)                    | 63.8                    | 64.6                    | 67.7                    | 110.7                  | 102.2                   | 90.3                    | 69.5                    | mbar               |
| $p_{\text{FR,Cyclone}}$                    | Pressure downstream of FR cyclone               | 5.9                     | 4.4                     | 5.9                     | 6.0                    | 5.4                     | 6.4                     | 5.9                     | mbar               |
| $\dot{m}_{\text{FM,FR}}$                   | Mass flow of FR fluidization (H <sub>2</sub> O) | 251.7                   | 239.8                   | 241.1                   | 259.1                  | 260.5                   | 261.4                   | 259.7                   | kg/h               |
| $\dot{m}_{\text{FM,AR}}$                   | Mass flow of AR fluidization*                   | 791.3                   | 985.0                   | 1094.5                  | 1141.5                 | 1143.2                  | 1091.0                  | 1044.5                  | kg/h               |
| $\dot{m}_{\text{CH}_3\text{B}_2\text{AR}}$ | Mass flow of propane entering AR                | 3.6                     | 3.6                     | 1.0                     | 1.0                    | 1.0                     | 1.0                     | 1.0                     | kg/h               |
| $\dot{m}_{\text{FM,LS1}}$                  | Vol. flow of LS1 fluidization                   | 14.5 (N <sub>2</sub> )  | 13.9 (N <sub>2</sub> )  | 14 (N <sub>2</sub> )    | 14 (N <sub>2</sub> )   | 14 (N <sub>2</sub> )    | 14.2 (N <sub>2</sub> )  | 14.9 (N <sub>2</sub> )  | Nm <sup>3</sup> /h |
| $\dot{m}_{\text{FM,LS5}}$                  | Vol. flow of LS5 fluidization                   | 15.1 (N <sub>2</sub> )  | 14.3 (N <sub>2</sub> )  | 14.2 (N <sub>2</sub> )  | 14.4 (N <sub>2</sub> ) | 14.3 (N <sub>2</sub> )  | 14.5 (N <sub>2</sub> )  | 14.7 (N <sub>2</sub> )  | Nm <sup>3</sup> /h |
| $\dot{m}_{\text{FM,J-Valve}}$              | Vol. flow of J-Valve fluidization               | 14.2 (CO <sub>2</sub> ) | 16.2 (CO <sub>2</sub> ) | 15.9 (CO <sub>2</sub> ) | 16 (CO <sub>2</sub> )  | 17.6 (CO <sub>2</sub> ) | 18.2 (CO <sub>2</sub> ) | 18.2 (CO <sub>2</sub> ) | Nm <sup>3</sup> /h |
| <b>Solid Samples</b>                       | Name of Solid Sample from LS1 & LS5             | 2-S-24                  | 2-S-26                  | 2-S-28                  | 2-S-31                 | 2-S-33                  | 2-S-35                  | 2-S-38                  | -                  |
|                                            |                                                 | 2-S-23                  | 2-S-25                  | 2-S-27                  | 2-S-30                 | 2-S-32                  | 2-S-34                  | 2-S-39                  | -                  |
| $d_{p,m}$                                  | Average particle diameter of OC                 | 179.4                   | 181.2"                  | 182.9"                  | 185.3"                 | 186.7"                  | 188.1                   | 189.8"                  | μm                 |
| $\rho_p$                                   | Particle density of OC                          | 3637.6                  | 3631.7"                 | 3626.4"                 | 3619"                  | 3614.6"                 | 3610.2"                 | 3606.5"                 | kg/m <sup>3</sup>  |
| $\Delta X_s$                               | Change in Xs for OC samples                     | 25.1                    | 28.3                    | 30.0                    | 36.4                   | 33.6                    | 24.5                    | 22.9                    | -                  |

\* AR fluidization medium: pure air or mixture of air & recycled flue gas

// No solid samples available

Cont'd: **Table S2.** Operating conditions for steady-state operating periods under investigation in K2 with corresponding solid samples. K2-BPX (steady-state operating period).

| Variable                           | Description                                     | BP8                     | BP9                     | BP10                   | BP11                    | BP12                    | BP13                    | BP14                    | BP15                    | Unit               |
|------------------------------------|-------------------------------------------------|-------------------------|-------------------------|------------------------|-------------------------|-------------------------|-------------------------|-------------------------|-------------------------|--------------------|
| $\dot{m}_{\text{Feedstock}}$       | Mass flow of biomass pellets to FR              | 257.0                   | 254.5                   | 311.8                  | 223.6                   | 225.9                   | 228.8                   | 230.3                   | 275.2                   | kg/h               |
| $\dot{m}_{\text{Make-Up}}$         | Mass flow of OC to LS1                          | 0.0                     | 0.0                     | 0.0                    | 0.0                     | 0.0                     | 0.0                     | 0.0                     | 0.0                     | kg/h               |
| $T_{\text{AR}}$                    | AR max. temperature                             | 936.3                   | 938.1                   | 924.2                  | 935.5                   | 946.9                   | 959.6                   | 964.6                   | 963.0                   | °C                 |
| $T_{\text{FR}}$                    | FR max. temperature                             | 789.0                   | 774.1                   | 738.9                  | 765.8                   | 784.8                   | 792.1                   | 814.0                   | 816.8                   | °C                 |
| $\Delta p_{\text{AR}}$             | AR pressure drop (inventory)                    | 45.7                    | 36.8                    | 34.1                   | 36.0                    | 41.3                    | 44.6                    | 47.5                    | 40.2                    | mbar               |
| $p_{\text{AR,Cyclone}}$            | Pressure downstream of AR cyclone               | -2.1                    | -2.0                    | -2.0                   | -2.0                    | -2.1                    | -1.9                    | -2.0                    | -2.0                    | mbar               |
| $\Delta p_{\text{FR}}$             | FR pressure drop (inventory)                    | 64.1                    | 80.3                    | 95.8                   | 82.5                    | 62.3                    | 96.8                    | 74.8                    | 67.6                    | mbar               |
| $p_{\text{FR,Cyclone}}$            | Pressure downstream of FR cyclone               | 6.3                     | 6.2                     | 4.6                    | 4.8                     | 4.0                     | 5.2                     | 5.4                     | 5.2                     | mbar               |
| $\dot{m}_{\text{FM,FR}}$           | Mass flow of FR fluidization (H <sub>2</sub> O) | 261.7                   | 262.7                   | 294.5                  | 304.9                   | 307.0                   | 319.4                   | 324.8                   | 324.3                   | kg/h               |
| $\dot{m}_{\text{FM,AR}}$           | Mass flow of AR fluidization*                   | 1041.2                  | 1044.6                  | 1061.2                 | 1055.1                  | 1048.6                  | 1126.3                  | 1158.9                  | 1189.9                  | kg/h               |
| $\dot{m}_{\text{CH}_3\text{B,AR}}$ | Mass flow of propane entering AR                | 0.9                     | 0.9                     | 0.9                    | 12.6                    | 12.6                    | 12.6                    | 12.6                    | 9.0                     | kg/h               |
| $\dot{m}_{\text{FM,LS1}}$          | Vol. flow of LS1 fluidization                   | 15 (N <sub>2</sub> )    | 14.9 (N <sub>2</sub> )  | 14.4 (N <sub>2</sub> ) | 14.3 (N <sub>2</sub> )  | 14.4 (N <sub>2</sub> )  | 14.5 (N <sub>2</sub> )  | 14.7 (N <sub>2</sub> )  | 14.6 (N <sub>2</sub> )  | Nm <sup>3</sup> /h |
| $\dot{m}_{\text{FM,LS5}}$          | Vol. flow of LS5 fluidization                   | 14.8 (N <sub>2</sub> )  | 14.9 (N <sub>2</sub> )  | 15.5 (N <sub>2</sub> ) | 15.3 (N <sub>2</sub> )  | 15 (N <sub>2</sub> )    | 14.9 (N <sub>2</sub> )  | 14.4 (N <sub>2</sub> )  | 14.3 (N <sub>2</sub> )  | Nm <sup>3</sup> /h |
| $\dot{m}_{\text{FM,J-Valve}}$      | Vol. flow of J-Valve fluidization               | 18.5 (CO <sub>2</sub> ) | 18.7 (CO <sub>2</sub> ) | 16 (CO <sub>2</sub> )  | 15.2 (CO <sub>2</sub> ) | 18.2 (CO <sub>2</sub> ) | 26.4 (CO <sub>2</sub> ) | 27.4 (CO <sub>2</sub> ) | 32.5 (CO <sub>2</sub> ) | Nm <sup>3</sup> /h |
| <b>Solid</b>                       | Name of Solid Sample from LS1 & LS5             | 2-S-40                  | 2-S-42                  | 2-S-45                 | 2-S-47                  | 2-S-51                  | 2-S-53                  | 2-S-54                  | 2-S-59                  | -                  |
| <b>Samples</b>                     | LS5                                             | 2-S-41                  | 2-S-43                  | 2-S-44                 | 2-S-46                  | 2-S-50                  | 2-S-52                  | 2-S-55                  | 2-S-58                  | -                  |
| $d_{p,m}$                          | Average particle diameter of OC                 | 192.2**                 | 193.8**                 | 198.8**                | 201**                   | 202.6                   | 204.1**                 | 204.5**                 | 204.9**                 | μm                 |
| $\rho_p$                           | Particle density of OC                          | 3601.3**                | 3597.6**                | 3586.8**               | 3581.9**                | 3578.4**                | 3557.3**                | 3552.6**                | 3546**                  | kg/m <sup>3</sup>  |
| $\Delta X_s$                       | Change in Xs for OC samples                     | 23.9                    | 22.5                    | 10.4                   | 16.5                    | 14.6                    | 24.2                    | 24.1                    | 17.9                    | -                  |

\* AR fluidization medium: pure air or mixture of air & recycled flue gas

// No solid samples available

Cont'd: **Table S2.** Operating conditions for steady-state operating periods under investigation in K2 with corresponding solid samples. K2-BPX (steady-state operating period).

| Variable                           | Description                                     | BP16                    | BP17                   | BP18                   | BP19                   | BP20                    | BP21                    | BP22                    | BP23                    | Unit               |
|------------------------------------|-------------------------------------------------|-------------------------|------------------------|------------------------|------------------------|-------------------------|-------------------------|-------------------------|-------------------------|--------------------|
| $\dot{m}_{\text{Feedstock}}$       | Mass flow of biomass pellets to FR              | 298.5                   | 281.1                  | 250.6                  | 284.6                  | 306.4                   | 274.2                   | 315.1                   | 313.3                   | kg/h               |
| $\dot{m}_{\text{Make-Up}}$         | Mass flow of OC to LS1                          | 0.0                     | 0.0                    | 58.8                   | 0.0                    | 0.0                     | 0.0                     | 53.2                    | 0.0                     | kg/h               |
| $T_{\text{AR}}$                    | AR max. temperature                             | 948.7                   | 961.2                  | 944.4                  | 946.3                  | 928.6                   | 922.4                   | 910.1                   | 891.2                   | °C                 |
| $T_{\text{FR}}$                    | FR max. temperature                             | 796.8                   | 812.7                  | 834.7                  | 839.1                  | 818.2                   | 803.8                   | 790.5                   | 800.2                   | °C                 |
| $\Delta p_{\text{AR}}$             | AR pressure drop (inventory)                    | 41.4                    | 50.4                   | 72.8                   | 64.6                   | 58.1                    | 52.9                    | 48.8                    | 54.6                    | mbar               |
| $p_{\text{AR,Cyclone}}$            | Pressure downstream of AR cyclone               | -2.0                    | -2.1                   | -2.1                   | -2.0                   | -2.0                    | -1.8                    | -2.0                    | -2.0                    | mbar               |
| $\Delta p_{\text{FR}}$             | FR pressure drop (inventory)                    | 60.6                    | 55.6                   | 47.9                   | 48.2                   | 56.0                    | 58.6                    | 59.6                    | 62.5                    | mbar               |
| $p_{\text{FR,Cyclone}}$            | Pressure downstream of FR cyclone               | 28.9                    | 6.8                    | 5.3                    | 7.0                    | 5.5                     | 5.0                     | 5.5                     | 6.0                     | mbar               |
| $\dot{m}_{\text{FM,FR}}$           | Mass flow of FR fluidization (H <sub>2</sub> O) | 298.8                   | 288.6                  | 310.5                  | 292.9                  | 294.1                   | 296.8                   | 297.9                   | 294.6                   | kg/h               |
| $\dot{m}_{\text{FM,AR}}$           | Mass flow of AR fluidization*                   | 1207.9                  | 1128.0                 | 1098.5                 | 1098.8                 | 1110.7                  | 1113.6                  | 1112.6                  | 1113.5                  | kg/h               |
| $\dot{m}_{\text{CH}_3\text{B,AR}}$ | Mass flow of propane entering AR                | 5.3                     | 5.3                    | 7.2                    | 1.0                    | 0.9                     | 0.9                     | 0.9                     | 0.9                     | kg/h               |
| $\dot{m}_{\text{FM,LS1}}$          | Vol. flow of LS1 fluidization                   | 13.9 (N <sub>2</sub> )  | 14.7 (N <sub>2</sub> ) | 15.7 (N <sub>2</sub> ) | 15.4 (N <sub>2</sub> ) | 15.4 (N <sub>2</sub> )  | 15.4 (N <sub>2</sub> )  | 15.4 (N <sub>2</sub> )  | 15.5 (N <sub>2</sub> )  | Nm <sup>3</sup> /h |
| $\dot{m}_{\text{FM,LS5}}$          | Vol. flow of LS5 fluidization                   | 14.8 (N <sub>2</sub> )  | 13.3 (N <sub>2</sub> ) | 13.2 (N <sub>2</sub> ) | 13.1 (N <sub>2</sub> ) | 12.1 (CO <sub>2</sub> ) | 13.5 (N <sub>2</sub> )  | 12.7 (CO <sub>2</sub> ) | 13.8 (CO <sub>2</sub> ) | Nm <sup>3</sup> /h |
| $\dot{m}_{\text{FM,J-Valve}}$      | Vol. flow of J-Valve fluidization               | 15.4 (CO <sub>2</sub> ) | 12.4 (N <sub>2</sub> ) | 15.8 (N <sub>2</sub> ) | 15.8 (N <sub>2</sub> ) | 16.9 (CO <sub>2</sub> ) | 17.9 (CO <sub>2</sub> ) | 17.9 (CO <sub>2</sub> ) | 17.9 (CO <sub>2</sub> ) | Nm <sup>3</sup> /h |
| <b>Solid</b>                       | Name of Solid Sample from LS1 & LS5             | 2-S-80                  | 2-S-82                 | 2-S-92                 | 2-S-96                 | 2-S-98                  | 2-S-100                 | 2-S-102                 | 2-S-104                 | -                  |
| <b>Samples</b>                     | LS5                                             | 2-S-79                  | 2-S-81                 | 2-S-91                 | 2-S-95                 | 2-S-97                  | 2-S-99                  | 2-S-101                 | 2-S-103                 | -                  |
| $d_{p,m}$                          | Average particle diameter of OC                 | 211.2**                 | 215.0                  | 186.2**                | 182.7                  | 185.3**                 | 186.9**                 | 189.9**                 | 192.1                   | μm                 |
| $\rho_p$                           | Particle density of OC                          | 3457.3**                | 3403.2                 | 3419.9**               | 3421.9**               | 3424.5**                | 3426.2**                | 3429.2**                | 3431.5                  | kg/m <sup>3</sup>  |
| $\Delta X_s$                       | Change in Xs for OC samples                     | 20.1                    | 20.9                   | 19.6                   | 20.4                   | 20.7                    | 17.9                    | 18.1                    | 15.0                    | -                  |

\* AR fluidization medium: pure air or mixture of air & recycled flue gas

// No solid samples available

Cont'd: **Table S2.** Operating conditions for steady-state operating periods under investigation in K2 with corresponding solid samples. K2-BPX (steady-state operating period).

| Variable | Description | BP24 | BP25 | BP26 | BP27 | BP28 | BP29 | BP30 | BP31 | Unit |
|----------|-------------|------|------|------|------|------|------|------|------|------|
|----------|-------------|------|------|------|------|------|------|------|------|------|

|                                   |                                                 |                         |                         |                         |                         |                         |                         |                         |                         |                    |
|-----------------------------------|-------------------------------------------------|-------------------------|-------------------------|-------------------------|-------------------------|-------------------------|-------------------------|-------------------------|-------------------------|--------------------|
| $\dot{m}_{\text{Feedstock}}$      | Mass flow of biomass pellets to FR              | 323.6                   | 298.9                   | 336.1                   | 353.5                   | 324.2                   | 370.1                   | 310.2                   | 302.1                   | kg/h               |
| $\dot{m}_{\text{Make-Up}}$        | Mass flow of OC to LS1                          | 46.4                    | 0.0                     | 0.0                     | 52.9                    | 0.0                     | 49.2                    | 25.6                    | 50.2                    | kg/h               |
| $T_{\text{AR}}$                   | AR max. temperature                             | 878.9                   | 869.0                   | 869.7                   | 874.4                   | 885.0                   | 878.2                   | 872.3                   | 859.6                   | °C                 |
| $T_{\text{FR}}$                   | FR max. temperature                             | 800.7                   | 803.2                   | 799.8                   | 807.5                   | 815.0                   | 816.1                   | 821.2                   | 807.2                   | °C                 |
| $\Delta p_{\text{AR}}$            | AR pressure drop (inventory)                    | 46.2                    | 49.0                    | 42.4                    | 44.5                    | 40.8                    | 42.1                    | 37.0                    | 29.4                    | mbar               |
| $p_{\text{AR,Cyclone}}$           | Pressure downstream of AR cyclone               | -2.0                    | -1.9                    | -2.0                    | -1.9                    | -2.0                    | -2.0                    | -2.1                    | -1.9                    | mbar               |
| $\Delta p_{\text{FR}}$            | FR pressure drop (inventory)                    | 61.0                    | 61.2                    | 59.4                    | 62.8                    | 63.6                    | 65.9                    | 78.2                    | 97.7                    | mbar               |
| $p_{\text{FR,Cyclone}}$           | Pressure downstream of FR cyclone               | 6.2                     | 5.9                     | 6.5                     | 6.7                     | 7.3                     | 7.5                     | 6.8                     | 6.7                     | mbar               |
| $\dot{m}_{\text{FM,FR}}$          | Mass flow of FR fluidization (H <sub>2</sub> O) | 297.8                   | 300.3                   | 301.6                   | 291.4                   | 284.0                   | 284.5                   | 290.1                   | 300.8                   | kg/h               |
| $\dot{m}_{\text{FM,AR}}$          | Mass flow of AR fluidization*                   | 1097.9                  | 1098.7                  | 1099.2                  | 1095.5                  | 1095.8                  | 1094.6                  | 1118.8                  | 1123.4                  | kg/h               |
| $\dot{m}_{\text{CH}_4,\text{AR}}$ | Mass flow of propane entering AR                | 0.9                     | 0.9                     | 0.9                     | 0.9                     | 0.9                     | 0.9                     | 0.9                     | 0.9                     | kg/h               |
| $\dot{m}_{\text{FM,LS1}}$         | Vol. flow of LS1 fluidization                   | 15.9 (N <sub>2</sub> )  | 15.8 (N <sub>2</sub> )  | 16 (N <sub>2</sub> )    | 15.8 (N <sub>2</sub> )  | 15.6 (N <sub>2</sub> )  | 15.2 (N <sub>2</sub> )  | 15 (N <sub>2</sub> )    | 15 (N <sub>2</sub> )    | Nm <sup>3</sup> /h |
| $\dot{m}_{\text{FM,LS5}}$         | Vol. flow of LS5 fluidization                   | 12.5 (CO <sub>2</sub> ) | 13.6 (CO <sub>2</sub> ) | 13.4 (CO <sub>2</sub> ) | 13.4 (CO <sub>2</sub> ) | 13.5 (CO <sub>2</sub> ) | 12.9 (CO <sub>2</sub> ) | 12.2 (CO <sub>2</sub> ) | 13.2 (CO <sub>2</sub> ) | Nm <sup>3</sup> /h |
| $\dot{m}_{\text{FM,J-Valve}}$     | Vol. flow of J-Valve fluidization               | 17.9 (CO <sub>2</sub> ) | 8.5 (CO <sub>2</sub> )  | 8.5 (CO <sub>2</sub> )  | Nm <sup>3</sup> /h |
| <b>Solid Samples</b>              | Name of Solid Sample from LS1 & LS5             | 2-S-106                 | 2-S-110                 | 2-S-112                 | 2-S-114                 | 2-S-117                 | 2-S-121                 | 2-S-126                 | 2-S-130                 | -                  |
|                                   |                                                 | 2-S-105                 | 2-S-109                 | 2-S-111                 | 2-S-113                 | 2-S-118                 | 2-S-122                 | 2-S-125                 | 2-S-129                 | -                  |
| $d_{p,m}$                         | Average particle diameter of OC                 | 188.5"                  | 186.7"                  | 183.3                   | 179.9"                  | 174.9"                  | 169.0                   | 169.1"                  | 169.2"                  | µm                 |
| $\rho_p$                          | Particle density of OC                          | 3415.4"                 | 3407.4"                 | 3392.3"                 | 3384.3"                 | 3372.3"                 | 3358.2                  | 3347.1"                 | 3342.4"                 | kg/m <sup>3</sup>  |
| $\Delta X_s$                      | Change in Xs for OC samples                     | 11.9                    | 9.1                     | 8.6                     | 9.6                     | 7.7                     | 11.3                    | 11.6                    | 11.2                    | -                  |

\* AR fluidization medium: pure air or mixture of air & recycled flue gas  
 // No solid samples available

Cont'd: **Table S2.** Operating conditions for steady-state operating periods under investigation in K2 with corresponding solid samples. K2-BPX (steady-state operating period).

| Variable                          | Description                                     | BP32                    | BP33                    | BP34                    | BP35                   | Unit               |
|-----------------------------------|-------------------------------------------------|-------------------------|-------------------------|-------------------------|------------------------|--------------------|
| $\dot{m}_{\text{Feedstock}}$      | Mass flow of biomass pellets to FR              | 300.3                   | 316.2                   | 314.6                   | 346.8                  | kg/h               |
| $\dot{m}_{\text{Make-Up}}$        | Mass flow of OC to LS1                          | 40.0                    | 0.0                     | 41.5                    | 35.0                   | kg/h               |
| $T_{\text{AR}}$                   | AR max. temperature                             | 861.5                   | 893.9                   | 919.9                   | 951.1                  | °C                 |
| $T_{\text{FR}}$                   | FR max. temperature                             | 808.6                   | 829.7                   | 848.5                   | 853.5                  | °C                 |
| $\Delta p_{\text{AR}}$            | AR pressure drop (inventory)                    | 29.5                    | 25.5                    | 22.9                    | 20.0                   | mbar               |
| $p_{\text{AR,Cyclone}}$           | Pressure downstream of AR cyclone               | -1.9                    | -2.1                    | -2.0                    | -1.9                   | mbar               |
| $\Delta p_{\text{FR}}$            | FR pressure drop (inventory)                    | 75.1                    | 85.6                    | 95.3                    | 84.1                   | mbar               |
| $p_{\text{FR,Cyclone}}$           | Pressure downstream of FR cyclone               | 6.6                     | 5.1                     | 5.0                     | 5.2                    | mbar               |
| $\dot{m}_{\text{FM,FR}}$          | Mass flow of FR fluidization (H <sub>2</sub> O) | 303.0                   | 252.8                   | 223.8                   | 200.8                  | kg/h               |
| $\dot{m}_{\text{FM,AR}}$          | Mass flow of AR fluidization*                   | 1121.9                  | 1117.6                  | 1115.1                  | 1116.3                 | kg/h               |
| $\dot{m}_{\text{CH}_4,\text{AR}}$ | Mass flow of propane entering AR                | 0.9                     | 0.9                     | 0.9                     | 0.9                    | kg/h               |
| $\dot{m}_{\text{FM,LS1}}$         | Vol. flow of LS1 fluidization                   | 15.1 (N <sub>2</sub> )  | 14.6 (N <sub>2</sub> )  | 14.2 (N <sub>2</sub> )  | 13.9 (N <sub>2</sub> ) | Nm <sup>3</sup> /h |
| $\dot{m}_{\text{FM,LS5}}$         | Vol. flow of LS5 fluidization                   | 13.2 (CO <sub>2</sub> ) | 13.2 (CO <sub>2</sub> ) | 13.1 (CO <sub>2</sub> ) | 11.1 (N <sub>2</sub> ) | Nm <sup>3</sup> /h |
| $\dot{m}_{\text{FM,J-Valve}}$     | Vol. flow of J-Valve fluidization               | 8.5 (CO <sub>2</sub> )  | 8.7 (N <sub>2</sub> )   | 8.7 (CO <sub>2</sub> )  | 8.2 (CO <sub>2</sub> ) | Nm <sup>3</sup> /h |
| <b>Solid Samples</b>              | Name of Solid Sample from LS1 & LS5             | 2-S-132                 | 2-S-136                 | 2-S-142                 | 2-S-145                | -                  |
|                                   |                                                 | 2-S-131                 | 2-S-135                 | 2-S-141                 | 2-S-146                | -                  |
| $d_{p,m}$                         | Average particle diameter of OC                 | 169.3"                  | 169.3"                  | 169.4"                  | 169.5                  | µm                 |
| $\rho_p$                          | Particle density of OC                          | 3338.5"                 | 3335.4"                 | 3332.4"                 | 3321.9                 | kg/m <sup>3</sup>  |
| $\Delta X_s$                      | Change in Xs for OC samples                     | 7.7                     | 12.1                    | 15.3                    | 20.3                   | -                  |

\* AR fluidization medium: pure air or mixture of air & recycled flue gas  
 // No solid samples available

**Table S3.** Operating conditions for steady-state operating periods under investigation in K3 with corresponding solid samples. K3-BPX (steady-state operating period).

| Variable                          | Description                                     | BP9                     | BP11                    | BP12                    | BP14                    | BP16                   | Unit               |
|-----------------------------------|-------------------------------------------------|-------------------------|-------------------------|-------------------------|-------------------------|------------------------|--------------------|
| $\dot{m}_{\text{Feedstock}}$      | Mass flow of biomass pellets to FR              | 398.7                   | 281.5                   | 349.1                   | 285.2                   | 273.5                  | kg/h               |
| $\dot{m}_{\text{Make-Up}}$        | Mass flow of OC to LS1                          | 52.7                    | 37.9                    | 27.8                    | 0.0                     | 0.0                    | kg/h               |
| $T_{\text{AR}}$                   | AR max. temperature                             | 962.1                   | 986.0                   | 975.3                   | 952.3                   | 951.9                  | °C                 |
| $T_{\text{FR}}$                   | FR max. temperature                             | 839.1                   | 827.8                   | 813.1                   | 787.8                   | 796.2                  | °C                 |
| $\Delta p_{\text{AR}}$            | AR pressure drop (inventory)                    | 73.6                    | 66.2                    | 71.6                    | 50.8                    | 38.9                   | mbar               |
| $p_{\text{AR,Cyclone}}$           | Pressure downstream of AR cyclone               | -2.0                    | -2.0                    | -2.1                    | -2.0                    | -2.0                   | mbar               |
| $\Delta p_{\text{FR}}$            | FR pressure drop (inventory)                    | 42.9                    | 73.0                    | 86.3                    | 67.6                    | 72.8                   | mbar               |
| $p_{\text{FR,Cyclone}}$           | Pressure downstream of FR cyclone               | 5.1                     | 4.9                     | 4.8                     | 4.8                     | 5.0                    | mbar               |
| $\dot{m}_{\text{FM,FR}}$          | Mass flow of FR fluidization (H <sub>2</sub> O) | 304.0                   | 277.0                   | 277.2                   | 298.2                   | 293.0                  | kg/h               |
| $\dot{m}_{\text{FM,AR}}$          | Mass flow of AR fluidization*                   | 1140.7                  | 1095.6                  | 1105.4                  | 1108.9                  | 1107.4                 | kg/h               |
| $\dot{m}_{\text{CH}_8,\text{AR}}$ | Mass flow of propane entering AR                | 6.4                     | 7.9                     | 7.9                     | 3.4                     | 7.9                    | kg/h               |
| $\dot{m}_{\text{FM,LS1}}$         | Vol. flow of LS1 fluidization                   | 16.3 (N <sub>2</sub> )  | 16.5 (N <sub>2</sub> )  | 16.4 (N <sub>2</sub> )  | 16.5 (N <sub>2</sub> )  | 16.3 (N <sub>2</sub> ) | Nm <sup>3</sup> /h |
| $\dot{m}_{\text{FM,LS5}}$         | Vol. flow of LS5 fluidization                   | 13.8 (N <sub>2</sub> )  | 13.8 (N <sub>2</sub> )  | 14 (N <sub>2</sub> )    | 14.3 (N <sub>2</sub> )  | 14.2 (N <sub>2</sub> ) | Nm <sup>3</sup> /h |
| $\dot{m}_{\text{FM,J-Valve}}$     | Vol. flow of J-Valve fluidization               | 12.7 (CO <sub>2</sub> ) | 16.6 (CO <sub>2</sub> ) | 16.2 (CO <sub>2</sub> ) | 16.6 (CO <sub>2</sub> ) | 17 (CO <sub>2</sub> )  | Nm <sup>3</sup> /h |
| <b>Solid</b>                      | Name of Solid Sample from LS1 &                 | 3-S-17                  | 3-S-24                  | 3-S-28                  | 3-S-32                  | 3-S-34                 | -                  |
| <b>Samples</b>                    | LS5                                             | 3-S-16                  | 3-S-23                  | 3-S-27                  | 3-S-31                  | 3-S-33                 | -                  |
| $d_{p,m}$                         | Average particle diameter of OC                 | 169.0                   | 169.5                   | 171.5                   | 188.0                   | 203.2                  | μm                 |
| $\rho_p$                          | Particle density of OC                          | 3398.8                  | 3435.5**                | 3444.0                  | 3403.8**                | 3377.3                 | kg/m <sup>3</sup>  |
| $\Delta X_s$                      | Change in Xs for OC samples                     | 16.1                    | 21.5                    | 25.7                    | 20.5                    | 18.1                   | -                  |

\* AR fluidization medium: pure air or mixture of air & recycled flue gas

// No solid samples available

## Supplementary Material S2 – Boundary Conditions of Operating periods from cold flow model under Consideration

The boundary conditions for each steady-state operating period under consideration in the CFM are listed in **Table S4** (bronze) and **Table S5** (ilmenite).

**Table S4.** Operating conditions for steady-state operating periods under investigation in CFM with bronze powder. CFM-BPX (steady-state operating period).

| Variable             | Description                       | BP1  | BP2  | BP3  | BP4   | BP5   | BP6  | BP7   | BP8  | BP9  | BP10 | Unit                |
|----------------------|-----------------------------------|------|------|------|-------|-------|------|-------|------|------|------|---------------------|
| $u_{0,AR}$           | AR gas velocity                   | 1.59 | 1.63 | 1.73 | 1.91  | 2.11  | 1.95 | 1.98  | 2.16 | 1.56 | 1.61 | m/s                 |
| $\Delta p_{AR}$      | AR pressure drop (inventory)      | 47.3 | 39.3 | 35.5 | 36.5  | 35.4  | 33.8 | 30.0  | 31.1 | 32.1 | 29.0 | mbar                |
| $u_{0,FR}$           | FR gas velocity                   | 3.37 | 2.70 | 3.49 | 2.73  | 2.68  | 2.75 | 2.76  | 2.70 | 3.26 | 2.76 | m/s                 |
| $\Delta p_{FR}$      | FR pressure drop (inventory)      | 17.2 | 25.1 | 26.7 | 22.2  | 22.2  | 34.3 | 36.3  | 35.0 | 8.1  | 10.4 | mbar                |
| $\dot{V}_{J-valve}$  | Vol. flow of J-valve fluidization | 0.8  | 0.85 | 1.1  | 0.39  | 0.315 | 0.59 | 0.605 | 0.49 | 0.4  | 0.4  | NI/min              |
| $\Delta p_{J-valve}$ | J-Valve pressure drop             | 66.2 | 69.5 | 72.7 | 103.4 | 115.1 | 88.7 | 89.1  | 99.2 | 81.6 | 74.8 | mbar                |
| $G_{s,AR}$           | AR Entrainment flux               | 9.7  | 10.3 | 12.6 | 20.3  | 25.6  | 18.4 | 18.5  | 25.9 | 6.6  | 6.9  | kg/m <sup>2</sup> s |
| $G_{s,FR}$           | FR Entrainment flux               | 21.4 | 22.6 | 31.0 | 22.0  | 21.4  | 26.3 | 27.0  | 24.9 | 14.4 | 14.6 | kg/m <sup>2</sup> s |

Cont'd: **Table S4.** Operating conditions for steady-state operating periods under investigation in CFM with bronze powder. CFM-BPX (steady-state operating period).

| Variable             | Description                       | BP-11 | BP-12 | BP-13 | BP-14 | BP-15 | BP-16 | BP-17 | BP-18 | BP-19 | BP-20 | Unit                |
|----------------------|-----------------------------------|-------|-------|-------|-------|-------|-------|-------|-------|-------|-------|---------------------|
| $u_{0,AR}$           | AR gas velocity                   | 1.71  | 1.76  | 1.81  | 1.89  | 1.96  | 2.01  | 2.06  | 1.59  | 2.03  | 1.89  | m/s                 |
| $\Delta p_{AR}$      | AR pressure drop (inventory)      | 28.0  | 27.2  | 24.4  | 22.1  | 20.1  | 19.1  | 17.2  | 32.5  | 15.8  | 21.4  | mbar                |
| $u_{0,FR}$           | FR gas velocity                   | 3.38  | 3.08  | 3.38  | 3.38  | 3.33  | 3.27  | 3.16  | 3.18  | 2.90  | 3.03  | m/s                 |
| $\Delta p_{FR}$      | FR pressure drop (inventory)      | 12.1  | 15.4  | 16.2  | 18.1  | 21.8  | 24.5  | 30.5  | 8.5   | 30.9  | 21.0  | mbar                |
| $\dot{V}_{J-valve}$  | Vol. flow of J-valve fluidization | 0.52  | 0.52  | 0.7   | 0.75  | 0.89  | 0.89  | 0.96  | 0.45  | 0.81  | 0.81  | NI/min              |
| $\Delta p_{J-valve}$ | J-Valve pressure drop             | 79.0  | 84.4  | 76.4  | 76.5  | 70.9  | 72.9  | 71.1  | 74.6  | 75.4  | 72.2  | mbar                |
| $G_{s,AR}$           | AR Entrainment flux               | 8.8   | 9.2   | 10.7  | 11.5  | 12.8  | 12.9  | 13.9  | 7.2   | 11.7  | 10.7  | kg/m <sup>2</sup> s |
| $G_{s,FR}$           | FR Entrainment flux               | 20.0  | 20.1  | 24.0  | 25.2  | 26.0  | 27.0  | 28.5  | 14.9  | 26.0  | 24.2  | kg/m <sup>2</sup> s |

Cont'd: **Table S4.** Operating conditions for steady-state operating periods under investigation in CFM with bronze powder. CFM-BPX (steady-state operating period).

| Variable             | Description                       | BP-21 | BP-22 | BP-23 | BP-24 | BP-25 | BP-26 | BP-27 | BP-28 | BP-29 | BP-30 | Unit                |
|----------------------|-----------------------------------|-------|-------|-------|-------|-------|-------|-------|-------|-------|-------|---------------------|
| $u_{0,AR}$           | AR gas velocity                   | 1.74  | 1.82  | 2.02  | 1.94  | 1.88  | 1.85  | 1.79  | 2.00  | 1.80  | 1.82  | m/s                 |
| $\Delta p_{AR}$      | AR pressure drop (inventory)      | 27.7  | 24.2  | 18.3  | 20.8  | 21.4  | 21.2  | 23.2  | 17.6  | 22.6  | 19.9  | mbar                |
| $u_{0,FR}$           | FR gas velocity                   | 3.14  | 3.14  | 3.17  | 3.21  | 2.92  | 2.73  | 2.91  | 2.92  | 2.85  | 2.49  | m/s                 |
| $\Delta p_{FR}$      | FR pressure drop (inventory)      | 13.2  | 16.9  | 25.9  | 20.8  | 21.4  | 20.2  | 16.2  | 25.3  | 17.1  | 21.1  | mbar                |
| $\dot{V}_{J-valve}$  | Vol. flow of J-valve fluidization | 0.52  | 0.68  | 0.9   | 0.9   | 0.79  | 0.65  | 0.6   | 0.8   | 0.65  | 0.65  | NI/min              |
| $\Delta p_{J-valve}$ | J-Valve pressure drop             | 80.2  | 75.9  | 72.1  | 73.6  | 69.4  | 73.1  | 74.3  | 71.5  | 71.9  | 70.7  | mbar                |
| $G_{s,AR}$           | AR Entrainment flux               | 9.4   | 10.5  | 12.8  | 11.8  | 10.7  | 9.8   | 9.0   | 11.8  | 9.1   | 8.8   | kg/m <sup>2</sup> s |
| $G_{s,FR}$           | FR Entrainment flux               | 21.0  | 22.0  | 26.8  | 25.3  | 23.7  | 20.6  | 20.2  | 25.4  | 20.6  | 18.9  | kg/m <sup>2</sup> s |



Cont'd: **Table S4.** Operating conditions for steady-state operating periods under investigation in CFM with bronze powder. CFM-BPX (steady-state operating period).

| Variable             | Description                       | BP-31 | BP-32 | BP-33 | BP-34 | BP-35 | BP-36 | BP-37 | BP-38 | BP-39 | BP-40 | Unit                |
|----------------------|-----------------------------------|-------|-------|-------|-------|-------|-------|-------|-------|-------|-------|---------------------|
| $u_{0,AR}$           | AR gas velocity                   | 1.67  | 1.98  | 2.04  | 1.62  | 1.71  | 1.83  | 1.82  | 1.87  | 1.88  | 1.87  | m/s                 |
| $\Delta p_{AR}$      | AR pressure drop (inventory)      | 21.3  | 18.0  | 16.9  | 41.7  | 42.2  | 33.7  | 35.3  | 31.4  | 31.5  | 25.5  | mbar                |
| $u_{0,FR}$           | FR gas velocity                   | 2.14  | 2.75  | 2.78  | 3.29  | 3.21  | 3.16  | 3.13  | 3.00  | 3.08  | 2.73  | m/s                 |
| $\Delta p_{FR}$      | FR pressure drop (inventory)      | 16.1  | 25.6  | 31.3  | 13.0  | 18.7  | 26.2  | 30.1  | 33.5  | 31.2  | 21.0  | mbar                |
| $\dot{V}_{J-valve}$  | Vol. flow of J-valve fluidization | 0.4   | 0.7   | 0.9   | 0.5   | 0.68  | 0.8   | 1.03  | 0.9   | 1.08  | 0.58  | NI/min              |
| $\Delta p_{J-valve}$ | J-Valve pressure drop             | 76.0  | 75.6  | 70.7  | 81.7  | 77.8  | 75.9  | 67.5  | 73.9  | 65.5  | 79.4  | mbar                |
| $G_{s,AR}$           | AR Entrainment flux               | 6.6   | 11.0  | 11.7  | 8.4   | 11.4  | 12.1  | 12.6  | 12.3  | 11.9  | 9.8   | kg/m <sup>2</sup> s |
| $G_{s,FR}$           | FR Entrainment flux               | 13.4  | 23.9  | 26.3  | 18.9  | 23.2  | 26.9  | 28.1  | 27.4  | 26.7  | 21.6  | kg/m <sup>2</sup> s |

Cont'd: **Table S4.** Operating conditions for steady-state operating periods under investigation in CFM with bronze powder. CFM-BPX (steady-state operating period).

| Variable             | Description                       | BP-41 | BP-42 | BP-43 | BP-44 | BP-45 | BP-46 | BP-47 | BP-48 | BP-49 | BP-50 | Unit                |
|----------------------|-----------------------------------|-------|-------|-------|-------|-------|-------|-------|-------|-------|-------|---------------------|
| $u_{0,AR}$           | AR gas velocity                   | 1.88  | 2.04  | 1.62  | 1.71  | 1.71  | 1.83  | 1.82  | 1.95  | 1.71  | 1.81  | m/s                 |
| $\Delta p_{AR}$      | AR pressure drop (inventory)      | 27.5  | 21.2  | 31.0  | 31.4  | 24.4  | 25.4  | 20.1  | 20.3  | 27.5  | 23.8  | mbar                |
| $u_{0,FR}$           | FR gas velocity                   | 2.90  | 2.89  | 2.76  | 3.28  | 2.40  | 3.09  | 2.19  | 2.83  | 3.11  | 3.12  | m/s                 |
| $\Delta p_{FR}$      | FR pressure drop (inventory)      | 21.4  | 25.4  | 8.4   | 9.4   | 10.5  | 11.6  | 15.5  | 13.7  | 7.7   | 9.0   | mbar                |
| $\dot{V}_{J-valve}$  | Vol. flow of J-valve fluidization | 0.68  | 0.68  | 0.4   | 0.41  | 0.36  | 0.41  | 0.5   | 0.65  | 0.48  | 0.5   | NI/min              |
| $\Delta p_{J-valve}$ | J-Valve pressure drop             | 76.6  | 79.5  | 79.8  | 85.8  | 86.9  | 86.2  | 74.6  | 69.6  | 73.7  | 73.7  | mbar                |
| $G_{s,AR}$           | AR Entrainment flux               | 10.4  | 11.7  | 6.0   | 7.9   | 6.2   | 8.1   | 6.4   | 8.1   | 6.2   | 6.8   | kg/m <sup>2</sup> s |
| $G_{s,FR}$           | FR Entrainment flux               | 24.4  | 24.2  | 13.9  | 17.1  | 13.6  | 18.3  | 15.2  | 18.4  | 13.4  | 15.5  | kg/m <sup>2</sup> s |

Cont'd: **Table S4.** Operating conditions for steady-state operating periods under investigation in CFM with bronze powder. CFM-BPX (steady-state operating period).

| Variable             | Description                       | BP-51 | BP-52 | BP-53 | BP-54 | BP-55 | BP-56 | BP-57 | BP-58 | BP-59 | BP-60 | Unit                |
|----------------------|-----------------------------------|-------|-------|-------|-------|-------|-------|-------|-------|-------|-------|---------------------|
| $u_{0,AR}$           | AR gas velocity                   | 1.66  | 1.76  | 1.64  | 1.84  | 1.79  | 1.86  | 1.93  | 1.86  | 1.88  | 1.93  | m/s                 |
| $\Delta p_{AR}$      | AR pressure drop (inventory)      | 38.5  | 48.3  | 45.9  | 25.0  | 27.3  | 22.7  | 28.6  | 28.2  | 19.2  | 13.3  | mbar                |
| $u_{0,FR}$           | FR gas velocity                   | 3.34  | 2.89  | 3.35  | 2.87  | 2.76  | 2.75  | 3.18  | 3.01  | 3.06  | 3.00  | m/s                 |
| $\Delta p_{FR}$      | FR pressure drop (inventory)      | 9.3   | 23.5  | 12.0  | 22.0  | 19.3  | 22.3  | 28.6  | 24.2  | 23.9  | 24.2  | mbar                |
| $\dot{V}_{J-valve}$  | Vol. flow of J-valve fluidization | 0.5   | 0.7   | 0.5   | 0.58  | 0.6   | 0.6   | 0.7   | 0.58  | 0.65  | 0.65  | NI/min              |
| $\Delta p_{J-valve}$ | J-Valve pressure drop             | 76.5  | 76.0  | 81.6  | 84.3  | 78.2  | 80.3  | 79.8  | 83.5  | 73.1  | 73.6  | mbar                |
| $G_{s,AR}$           | AR Entrainment flux               | 7.9   | 10.9  | 9.1   | 10.1  | 9.5   | 9.7   | 13.1  | 10.8  | 10.8  | 10.6  | kg/m <sup>2</sup> s |
| $G_{s,FR}$           | FR Entrainment flux               | 17.5  | 23.7  | 20.0  | 23.2  | 19.8  | 21.7  | 27.9  | 23.6  | 23.9  | 24.2  | kg/m <sup>2</sup> s |

Cont'd: **Table S4.** Operating conditions for steady-state operating periods under investigation in CFM with bronze powder. CFM-BPX (steady-state operating period).

| Variable             | Description                       | BP-61 | BP-62 | BP-63 | BP-64 | BP-65 | BP-66 | BP-67 | BP-68 | BP-69 | BP-70 | Unit                |
|----------------------|-----------------------------------|-------|-------|-------|-------|-------|-------|-------|-------|-------|-------|---------------------|
| $u_{0,AR}$           | AR gas velocity                   | 1.67  | 1.68  | 1.66  | 1.88  | 1.90  | 1.84  | 1.96  | 1.71  | 1.81  | 1.79  | m/s                 |
| $\Delta p_{AR}$      | AR pressure drop (inventory)      | 18.1  | 17.9  | 17.4  | 9.8   | 14.0  | 16.4  | 12.4  | 19.5  | 18.8  | 11.4  | mbar                |
| $u_{0,FR}$           | FR gas velocity                   | 3.03  | 2.34  | 3.37  | 3.07  | 3.02  | 2.64  | 2.89  | 2.30  | 3.13  | 2.35  | m/s                 |
| $\Delta p_{FR}$      | FR pressure drop (inventory)      | 8.7   | 11.7  | 6.5   | 13.6  | 18.8  | 19.4  | 22.1  | 12.4  | 11.7  | 13.7  | mbar                |
| $\dot{V}_{J-valve}$  | Vol. flow of J-valve fluidization | 0.35  | 0.3   | 0.38  | 0.48  | 0.55  | 0.5   | 0.58  | 0.35  | 0.5   | 0.35  | Nl/min              |
| $\Delta p_{J-valve}$ | J-Valve pressure drop             | 81.9  | 86.0  | 81.2  | 80.1  | 79.6  | 78.9  | 80.7  | 85.7  | 78.8  | 88.4  | mbar                |
| $G_{s,AR}$           | AR Entrainment flux               | 6.3   | 6.3   | 6.2   | 8.7   | 9.8   | 8.6   | 10.3  | 6.4   | 8.4   | 6.6   | kg/m <sup>2</sup> s |
| $G_{s,FR}$           | FR Entrainment flux               | 14.2  | 14.1  | 14.1  | 19.2  | 21.8  | 18.5  | 21.7  | 13.5  | 17.7  | 14.7  | kg/m <sup>2</sup> s |

Cont'd: **Table S4.** Operating conditions for steady-state operating periods under investigation in CFM with bronze powder. CFM-BPX (steady-state operating period).

| Variable             | Description                       | BP-71 | BP-72 | BP-73 | BP-74 | BP-75 | BP-76 | BP-77 | BP-78 | BP-79 | BP-80 | Unit                |
|----------------------|-----------------------------------|-------|-------|-------|-------|-------|-------|-------|-------|-------|-------|---------------------|
| $u_{0,AR}$           | AR gas velocity                   | 1.79  | 1.64  | 1.73  | 2.00  | 2.01  | 2.35  | 2.35  | 2.34  | 2.02  | 2.36  | m/s                 |
| $\Delta p_{AR}$      | AR pressure drop (inventory)      | 18.3  | 32.3  | 34.5  | 7.1   | 4.6   | 4.6   | 3.3   | 14.7  | 17.0  | 11.8  | mbar                |
| $u_{0,FR}$           | FR gas velocity                   | 2.80  | 2.52  | 2.97  | 2.54  | 2.92  | 2.92  | 3.29  | 3.28  | 3.29  | 3.30  | m/s                 |
| $\Delta p_{FR}$      | FR pressure drop (inventory)      | 11.5  | 26.5  | 31.0  | 9.2   | 5.5   | 10.5  | 6.4   | 18.0  | 19.5  | 23.1  | mbar                |
| $\dot{V}_{J-valve}$  | Vol. flow of J-valve fluidization | 0.4   | 0.8   | 1     | 0.5   | 0.4   | 0.5   | 0.35  | 0.4   | 0.5   | 0.6   | Nl/min              |
| $\Delta p_{J-valve}$ | J-Valve pressure drop             | 82.3  | 76.0  | 71.5  | 77.9  | 79.7  | 81.6  | 74.0  | 104.3 | 98.4  | 100.8 | mbar                |
| $G_{s,AR}$           | AR Entrainment flux               | 7.6   | 9.0   | 14.2  | 5.6   | 4.8   | 5.3   | 4.3   | 15.9  | 11.8  | 13.9  | kg/m <sup>2</sup> s |
| $G_{s,FR}$           | FR Entrainment flux               | 17.5  | 20.1  | 28.8  | 15.7  | 11.9  | 19.7  | 15.7  | 23.6  | 26.4  | 28.1  | kg/m <sup>2</sup> s |

Cont'd: **Table S4.** Operating conditions for steady-state operating periods under investigation in CFM with bronze powder. CFM-BPX (steady-state operating period).

| Variable             | Description                       | BP-81 | BP-82 | BP-83 | BP-84 | BP-85 | BP-86 | BP-87 | BP-88 | BP-89 | BP-90 | Unit                |
|----------------------|-----------------------------------|-------|-------|-------|-------|-------|-------|-------|-------|-------|-------|---------------------|
| $u_{0,AR}$           | AR gas velocity                   | 2.16  | 2.34  | 2.09  | 2.10  | 2.19  | 2.28  | 2.36  | 2.55  | 2.55  | 2.55  | m/s                 |
| $\Delta p_{AR}$      | AR pressure drop (inventory)      | 21.7  | 16.7  | 18.5  | 12.9  | 18.2  | 14.1  | 24.5  | 15.6  | 11.4  | 16.2  | mbar                |
| $u_{0,FR}$           | FR gas velocity                   | 3.62  | 3.63  | 3.65  | 2.94  | 2.55  | 2.57  | 2.59  | 2.59  | 2.59  | 2.96  | m/s                 |
| $\Delta p_{FR}$      | FR pressure drop (inventory)      | 28.3  | 32.7  | 24.0  | 20.0  | 35.3  | 39.2  | 33.4  | 33.1  | 24.4  | 32.3  | mbar                |
| $\dot{V}_{J-valve}$  | Vol. flow of J-valve fluidization | 0.6   | 0.7   | 0.7   | 0.7   | 0.6   | 0.65  | 0.5   | 0.6   | 0.6   | 0.6   | Nl/min              |
| $\Delta p_{J-valve}$ | J-Valve pressure drop             | 98.7  | 98.1  | 92.9  | 88.5  | 96.0  | 95.0  | 112.2 | 104.6 | 100.8 | 100.7 | mbar                |
| $G_{s,AR}$           | AR Entrainment flux               | 16.6  | 18.1  | 13.1  | 10.7  | 15.2  | 14.7  | -     | 19.3  | 14.7  | 18.2  | kg/m <sup>2</sup> s |
| $G_{s,FR}$           | FR Entrainment flux               | 33.2  | 34.0  | 31.3  | 26.7  | 26.4  | 25.8  | 22.7  | 27.3  | 25.5  | 29.9  | kg/m <sup>2</sup> s |

Cont'd: **Table S4.** Operating conditions for steady-state operating periods under investigation in CFM with bronze powder. CFM-BPX (steady-state operating period).

| Variable             | Description                       | BP-91 | BP-92 | BP-93 | BP-94 | BP-95 | BP-96 | BP-97 | BP-98 | BP-99 | BP-100 | Unit                |
|----------------------|-----------------------------------|-------|-------|-------|-------|-------|-------|-------|-------|-------|--------|---------------------|
| $u_{0,AR}$           | AR gas velocity                   | 2.36  | 2.55  | 2.55  | 2.55  | 2.56  | 2.52  | 2.50  | 2.19  | 2.37  | 2.54   | m/s                 |
| $\Delta p_{AR}$      | AR pressure drop (inventory)      | 11.4  | 8.2   | 16.8  | 13.1  | 13.7  | 9.3   | 36.6  | 32.2  | 28.2  | 17.8   | mbar                |
| $u_{0,FR}$           | FR gas velocity                   | 2.92  | 2.95  | 2.93  | 2.94  | 3.33  | 3.26  | 3.27  | 3.68  | 3.69  | 3.67   | m/s                 |
| $\Delta p_{FR}$      | FR pressure drop (inventory)      | 22.1  | 21.3  | 49.1  | 41.9  | 31.3  | 24.1  | 51.6  | 41.6  | 46.7  | 44.1   | mbar                |
| $\dot{V}_{J-valve}$  | Vol. flow of J-valve fluidization | 0.6   | 0.6   | 0.7   | 0.7   | 0.7   | 0.7   | 0.7   | 0.8   | 0.85  | 0.9    | Nl/min              |
| $\Delta p_{J-valve}$ | J-Valve pressure drop             | 96.8  | 93.2  | 96.2  | 92.7  | 93.4  | 88.5  | 109.4 | 94.9  | 93.7  | 88.3   | mbar                |
| $G_{s,AR}$           | AR Entrainment flux               | 12.1  | 12.4  | 31.4  | 18.2  | 17.6  | 14.0  | -     | 23.0  | 25.5  | 20.1   | kg/m <sup>2</sup> s |
| $G_{s,FR}$           | FR Entrainment flux               | 29.6  | 29.2  | 34.6  | 32.4  | 32.5  | 31.0  | 34.4  | 35.6  | 40.5  | 37.5   | kg/m <sup>2</sup> s |

Cont'd: **Table S4.** Operating conditions for steady-state operating periods under investigation in CFM with bronze powder. CFM-BPX (steady-state operating period).

| Variable             | Description                       | BP-101 | BP-102 | BP-103 | BP-104 | BP-105 | BP-106 | BP-107 | BP-108 | BP-109 | BP-110 | Unit                |
|----------------------|-----------------------------------|--------|--------|--------|--------|--------|--------|--------|--------|--------|--------|---------------------|
| $u_{0,AR}$           | AR gas velocity                   | 2.03   | 2.52   | 2.54   | 2.55   | 2.55   | 2.55   | 2.38   | 2.35   | 2.54   | 2.54   | m/s                 |
| $\Delta p_{AR}$      | AR pressure drop (inventory)      | 24.4   | 19.4   | 14.0   | 11.0   | 9.9    | 13.0   | 12.2   | 14.6   | 12.5   | 20.1   | mbar                |
| $u_{0,FR}$           | FR gas velocity                   | 3.71   | 3.63   | 3.29   | 3.11   | 2.92   | 4.05   | 4.06   | 3.98   | 4.02   | 4.03   | m/s                 |
| $\Delta p_{FR}$      | FR pressure drop (inventory)      | 20.0   | 59.2   | 61.0   | 60.7   | 70.2   | 36.5   | 24.0   | 29.5   | 33.5   | 43.3   | mbar                |
| $\dot{V}_{J-valve}$  | Vol. flow of J-valve fluidization | 0.7    | 1      | 1      | 1      | 1      | 1      | 1      | 1      | 1      | 0.95   | Nl/min              |
| $\Delta p_{J-valve}$ | J-Valve pressure drop             | 84.2   | 81.9   | 77.2   | 72.4   | 71.4   | 76.6   | 67.1   | 73.1   | 75.3   | 84.2   | mbar                |
| $G_{s,AR}$           | AR Entrainment flux               | 12.1   | 25.9   | 20.2   | 15.9   | 14.0   | 17.1   | 13.9   | 16.6   | 16.7   | 22.2   | kg/m <sup>2</sup> s |
| $G_{s,FR}$           | FR Entrainment flux               | 27.7   | 41.7   | 38.2   | 39.5   | 33.2   | 40.6   | 32.4   | 36.6   | 37.3   | 39.9   | kg/m <sup>2</sup> s |

Cont'd: **Table S4.** Operating conditions for steady-state operating periods under investigation in CFM with bronze powder. CFM-BPX (steady-state operating period).

| Variable             | Description                       | BP-111 | BP-112 | BP-113 | BP-114 | BP-115 | BP-116 | BP-117 | BP-118 | BP-119 | BP-120 | Unit                |
|----------------------|-----------------------------------|--------|--------|--------|--------|--------|--------|--------|--------|--------|--------|---------------------|
| $u_{0,AR}$           | AR gas velocity                   | 2.55   | 2.55   | 2.38   | 2.38   | 2.39   | 2.22   | 2.36   | 2.36   | 2.54   | 2.37   | m/s                 |
| $\Delta p_{AR}$      | AR pressure drop (inventory)      | 12.2   | 18.2   | 20.3   | 14.1   | 12.7   | 14.1   | 6.9    | 10.4   | 8.3    | 8.9    | mbar                |
| $u_{0,FR}$           | FR gas velocity                   | 3.32   | 3.29   | 3.33   | 2.90   | 2.96   | 4.09   | 4.01   | 4.02   | 4.04   | 3.66   | m/s                 |
| $\Delta p_{FR}$      | FR pressure drop (inventory)      | 45.6   | 74.6   | 60.9   | 62.2   | 53.1   | 17.6   | 12.4   | 21.2   | 17.1   | 16.5   | mbar                |
| $\dot{V}_{J-valve}$  | Vol. flow of J-valve fluidization | 1      | 1      | 1      | 0.9    | 1      | 0.8    | 0.8    | 0.8    | 1      | 0.6    | Nl/min              |
| $\Delta p_{J-valve}$ | J-Valve pressure drop             | 72.7   | 80.8   | 79.2   | 80.2   | 69.0   | 71.5   | 73.7   | 79.0   | 57.6   | 86.9   | mbar                |
| $G_{s,AR}$           | AR Entrainment flux               | 16.7   | 23.0   | 20.2   | 15.7   | 14.3   | 11.0   | 10.0   | 13.1   | -      | 11.4   | kg/m <sup>2</sup> s |
| $G_{s,FR}$           | FR Entrainment flux               | 35.7   | 38.3   | 36.3   | 32.5   | 30.9   | 28.8   | 24.4   | 29.2   | 27.5   | 26.4   | kg/m <sup>2</sup> s |

Cont'd: **Table S4.** Operating conditions for steady-state operating periods under investigation in CFM with bronze powder. CFM-BPX (steady-state operating period).

| Variable             | Description                       | BP-121 | BP-122 | BP-123 | BP-124 | BP-125 | BP-126 | BP-127 | BP-128 | Unit                |
|----------------------|-----------------------------------|--------|--------|--------|--------|--------|--------|--------|--------|---------------------|
| $u_{0,AR}$           | AR gas velocity                   | 2.54   | 2.55   | 2.19   | 2.20   | 2.20   | 2.67   | 2.67   | 2.69   | m/s                 |
| $\Delta p_{AR}$      | AR pressure drop (inventory)      | 12.1   | 8.4    | 6.8    | 6.1    | 4.9    | 15.4   | 27.9   | 17.1   | mbar                |
| $u_{0,FR}$           | FR gas velocity                   | 3.29   | 2.94   | 3.98   | 3.66   | 3.31   | 3.93   | 3.98   | 4.00   | m/s                 |
| $\Delta p_{FR}$      | FR pressure drop (inventory)      | 37.8   | 31.5   | 7.5    | 7.6    | 7.5    | 53.6   | 68.6   | 60.7   | mbar                |
| $V_{J-valve}$        | Vol. flow of J-valve fluidization | 0.9    | 0.9    | 0.5    | 0.5    | 0.5    | 1.2    | 1.2    | 1.3    | Nl/min              |
| $\Delta p_{J-valve}$ | J-Valve pressure drop             | 80.4   | 71.4   | 88.0   | 83.9   | 83.8   | 75.8   | 84.6   | 74.2   | mbar                |
| $G_{s,AR}$           | AR Entrainment flux               | 15.6   | 13.1   | 7.9    | 8.2    | 6.4    | 24.7   | 26.3   | 23.1   | kg/m <sup>2</sup> s |
| $G_{s,FR}$           | FR Entrainment flux               | 34.8   | 30.3   | 18.9   | 18.2   | 17.4   | 43.5   | 48.1   | 44.4   | kg/m <sup>2</sup> s |

**Table S5.** Operating conditions for steady-state operating periods under investigation in CFM with ilmenite powder. CFM-BPX (steady-state operating period). BP130-133 (ILMf), BP134-137 (ILMc).

| Variable        | Description                  | BP130 | BP131 | BP132 | BP133 | BP134 | BP135 | BP136 | BP137 | Unit |
|-----------------|------------------------------|-------|-------|-------|-------|-------|-------|-------|-------|------|
| $u_{0,AR}$      | AR gas velocity              | 1.27  | 1.47  | 1.61  | 1.94  | 1.29  | 1.66  | 2.04  | 2.40  | m/s  |
| $\Delta p_{AR}$ | AR pressure drop (inventory) | 18.7  | 18.5  | 17.8  | 16.4  | 21.2  | 23.6  | 18.2  | 16.2  | mbar |
| $G_{s,AR}$      | AR Entrainment flux          | 1.7   | 3.6   | 6.8   | 17.2  | 0.4   | 1.4   | 3.4   | 6.3   | m/s  |
